# Supplementary material for: A Phase 1 study of UCN-01 in combination with irinotecan in patients with resistant solid tumor malignancies
Source: Springer Nature journal article supplement (doi:10.1007/s00280-010-1410-1), 2010-08-07
Supplement: MOESM1 [file 8291486]

| **Supplemental Table 1** Responses for patients with breast cancer | | | | |
| --- | --- | --- | --- | --- |
| **Responses** | **No. Patients** | **ER, PR, and HER2 status** | **Duration of response (weeks)** | **Site of recurrence*** |
| Partial Response | 2 | TNBC | 18 | CW, LN |
| TNBC | 13 | CW, LN |
|  |  |  |  |  |
| Stable Disease | 4 | TNBC | 18 | LN, LI |
|  | TNBC | 6 | CW, LN |
| ER+, PR+, Her2- | 30 | LN, LI |
| ER+, PR+, Her2- | 12 | CW |
|  |  |  |  |  |
| Progressive Disease | 4 | TNBC | PD | LN |
| ER+, PR+, HER2- | PD | LI |
| ER+, PR+, HER2- | PD | LU, LN, CW |
| ER+, PR+, HER2- | PD | LN |

* Abbreviations–CW: chest wall; LN: lymph node, LI: Liver; LU: lung
